# Supplementary material
Source: PubMed Central journal article supplement (PMC5103084)
Supplement: AEM.02120-16_zam999117535so1.pdf [file AEM.02120-16_zam999117535so1.pdf]

Table S1. *In vitro* virulence

properties of strains C5, ScottA and PL25  
after 6 days of incubation in TSB-Y at 10°C  
and subsequent exposure to SGF for 20 min.

| <b>Strain</b> | <b>Combination</b>     | Total <i>in vitro</i><br>virulence<br>potential (%) |
|---------------|------------------------|-----------------------------------------------------|
| <b>C5</b>     | Single <sup>TSBY</sup> | 4.22±0.03 <sup>AB*</sup>                            |
|               | Single                 | 0.80±0.33 <sup>ab</sup>                             |
|               | +ScottA                | 0.76±0.37                                           |
|               | +PL25                  | N.C.                                                |
|               | +ScottA <sup>SGF</sup> | 0.26±0.22                                           |
|               | +PL25 <sup>SGF</sup>   | 0.23±0.01 <sup>†*</sup>                             |
| <b>ScottA</b> | Single <sup>TSBY</sup> | 3.12±1.19 <sup>B*</sup>                             |
|               | Single                 | 1.03±0.09 <sup>b</sup>                              |
|               | +C5                    | 1.16±0.21                                           |
|               | +PL25                  | N.C.                                                |
|               | +C5 <sup>SGF</sup>     | N.C.                                                |
|               | +PL25 <sup>SGF</sup>   | 0.19±0.06 <sup>†</sup>                              |
| <b>PL25</b>   | Single <sup>TSBY</sup> | 5.02±1.42 <sup>A*</sup>                             |
|               | Single                 | 0.69±0.21 <sup>a</sup>                              |
|               | +C5                    | 0.43±0.15 <sup>†</sup>                              |
|               | +ScottA                | 0.72±0.32                                           |
|               | +C5 <sup>SGF</sup>     | 0.70±0.19 <sup>*</sup>                              |
|               | +ScottA <sup>SGF</sup> | N.C.                                                |

<sup>TSBY</sup> Indicates that strains were used for the *in vitro* virulence assay without prior exposure to SGF

<sup>SGF</sup> Indicates that strains were grown individually, combined in SGF and during infection of Caco-2 cells

\* Significant differences between two strains in the same combination within each row

\*Significant differences between a single and single<sup>TSBY</sup> strain

† Significant differences between a single strain and the same strain in different combinations with a second strain

Different capital letters indicate significant differences between different single<sup>TSBY</sup> strains

Different small letters indicate significant differences between different single strains

N.C. Could not be enumerated at the end of the proliferation assay

Data represent mean values  $\pm$  SEM of three independent experiments performed in triplicates
